# Supplementary material for: The Diverse Reticulate Genetic Set-Up of Endangered Gladiolus palustris in Southern Germany Has Consequences for the Development of Conservation Strategies
Source: MDPI journal article supplement (doi:10.3390/d15101068), 2023-10-08
Supplement: s1 [file s1]

### Supplementary Tables S3 a – d.

The mean estimates of the posterior probabilities of the data for a given cluster number  $L(K)$  and the statistic  $\Delta K$  proposed by Evanno et al. (2005) were used to estimate the number of significant clusters  $K$  using STRUCTURE Harvester (Earl and von Holdt, 2012) as an indicator of the signal detected by STRUCTURE. Runs of STRUCTURE simulations for the most appropriate  $K$  were aligned using the Greedy option in CLUMPP v1.1.2 (Jakobsson and Rosenberg, 2007)

a) AFLP data without *G. illyricus* but all hybrids/putatively introgressed individuals as revealed by SplitsTree analysis. Results with Admixture option active.

| K        | Reps      | Mean LnP(K)     | Stdev LnP(K)  | Ln'(K)        | Ln''(K)       | Delta K           |
|----------|-----------|-----------------|---------------|---------------|---------------|-------------------|
| 1        | 10        | -9592,5         | 3,3456        | NA            | NA            | NA                |
| <b>2</b> | <b>10</b> | <b>-8865,76</b> | <b>5,7291</b> | <b>726,74</b> | <b>872,22</b> | <b>152,243623</b> |
| 3        | 10        | -9011,24        | 18,9505       | -145,48       | 251,36        | 13,264008         |
| 4        | 10        | -8905,36        | 18,8641       | 105,88        | 42,71         | 2,26409           |
| 5        | 10        | -8842,19        | 13,6356       | 63,17         | 11,89         | 0,871981          |
| 6        | 10        | -8790,91        | 11,2709       | 51,28         | 18,85         | 1,672456          |
| 7        | 10        | -8758,48        | 14,1279       | 32,43         | 5,09          | 0,36028           |
| 8        | 10        | -8731,14        | 13,1839       | 27,34         | 12,74         | 0,966328          |
| 9        | 10        | -8716,54        | 14,6146       | 14,6          | 8,28          | 0,566556          |
| 10       | 10        | -8693,66        | 9,0926        | 22,88         | NA            | NA                |

b) AFLP data without *G. illyricus* but all hybrids/putatively introgressed individuals as revealed by SplitsTree analysis. Results with NO Admixture option active.

| K        | Reps      | Mean LnP(K)     | Stdev LnP(K)   | Ln'(K)        | Ln''(K)        | Delta K          |
|----------|-----------|-----------------|----------------|---------------|----------------|------------------|
| 1        | 10        | -9511,95        | 4,2264         | NA            | NA             | NA               |
| <b>2</b> | <b>10</b> | <b>-7859,15</b> | <b>40,9021</b> | <b>1652,8</b> | <b>2185,62</b> | <b>53,435453</b> |
| 3        | 10        | -8391,97        | 2280,4121      | -532,82       | 884,14         | 0,387711         |
| 4        | 10        | -8040,65        | 401,6952       | 351,32        | NA             | NA               |
| 5        | 10        | NA              | NA             | NA            | NA             | NA               |
| 6        | 10        | -7934,87        | 407,72         | NA            | NA             | NA               |
| 7        | 10        | -8097,16        | 435,6147       | -162,29       | 2234,92        | 5,130497         |
| 8        | 10        | -10494,37       | 7766,9597      | -2397,21      | 4607,04        | 0,593159         |
| 9        | 10        | -8284,54        | 316,1845       | 2209,83       | 2637,77333     | 8,342514         |
| 10       | 6         | -8712,4833      | 510,3443       | -427,94       | NA             | NA               |

c) AFLP data without *G. illyricus* and without all hybrids/putatively introgressed individuals as revealed by SplitsTree analysis. Results with Admixture option active.

| K  | Reps | Mean LnP(K) | Stdev LnP(K) | Ln'(K) | Ln''(K) | Delta K         |
|----|------|-------------|--------------|--------|---------|-----------------|
| 1  | 10   | -6879,1     | 3,0916       | NA     | NA      | NA              |
| 2  | 10   | -6906,12    | 4,9202       | -27,02 | 16,02   | <b>3,25596</b>  |
| 3  | 10   | -6917,12    | 3,072        | -11    | 3       | 0,976555        |
| 4  | 10   | -6925,12    | 6,4368       | -8     | 1,03    | 0,160016        |
| 5  | 10   | -6932,09    | 3,4285       | -6,97  | 2,9     | 0,845861        |
| 6  | 10   | -6936,16    | 4,4458       | -4,07  | 1,26    | 0,283415        |
| 7  | 10   | -6938,97    | 4,4129       | -2,81  | 4,46    | 1,01068         |
| 8  | 10   | -6946,24    | 2,4337       | -7,27  | 6,54    | <b>2,687318</b> |
| 9  | 10   | -6946,97    | 3,5892       | -0,73  | 1,43    | 0,398418        |
| 10 | 10   | -6946,27    | 5,3012       | 0,7    | NA      | NA              |

d) AFLP data without *G. illyricus* and without all hybrids/putatively introgressed individuals as revealed by SplitsTree analysis. Results with NO Admixture option active.

| K        | Reps      | Mean LnP(K)    | Stdev LnP(K)   | Ln'(K)        | Ln''(K)       | Delta K          |
|----------|-----------|----------------|----------------|---------------|---------------|------------------|
| 1        | 10        | -6176,97       | 2,7681         | NA            | NA            | NA               |
| 2        | 10        | -7117,06       | 329,604        | -940,09       | 696,37        | 2,112748         |
| 3        | 10        | -7360,78       | 1405,5102      | -243,72       | 774,41        | 0,550981         |
| 4        | 10        | -6830,09       | 186,9328       | 530,69        | 331           | 1,77069          |
| <b>5</b> | <b>10</b> | <b>-6630,4</b> | <b>41,3036</b> | <b>199,69</b> | <b>512,46</b> | <b>12,407145</b> |
| 6        | 10        | -6943,17       | 401,1835       | -312,77       | 300,6         | 0,749283         |
| 7        | 10        | -6955,34       | 337,8037       | -12,17        | 971,16        | 2,874924         |
| 8        | 10        | -7938,67       | 1042,2982      | -983,33       | 889,83        | 0,853719         |
| 9        | 10        | -8032,17       | 1020,2128      | -93,5         | 426,15        | 0,417707         |
| 10       | 10        | -7699,52       | 625,1164       | 332,65        | NA            | NA               |
