# Supplementary figures and images for: The Diverse Reticulate Genetic Set-Up of Endangered Gladiolus palustris in Southern Germany Has Consequences for the Development of Conservation Strategies
Source: MDPI journal article supplement (doi:10.3390/d15101068), 2023-10-08

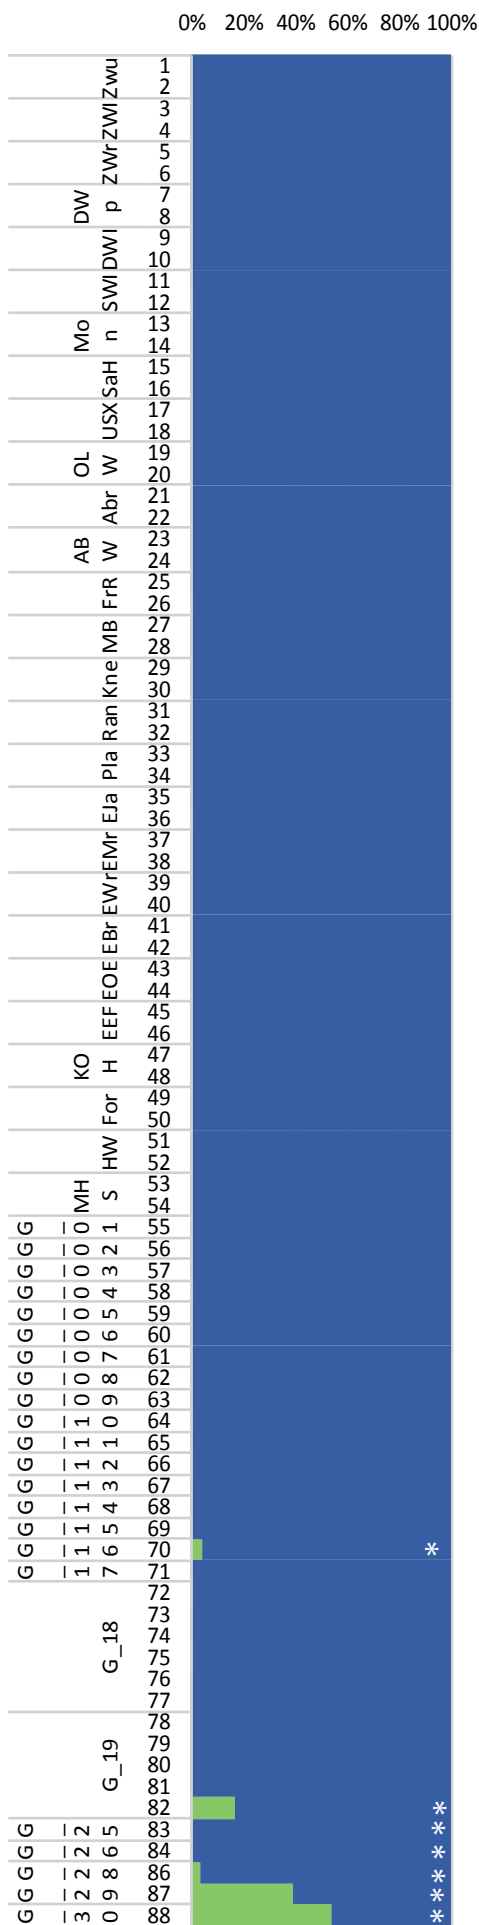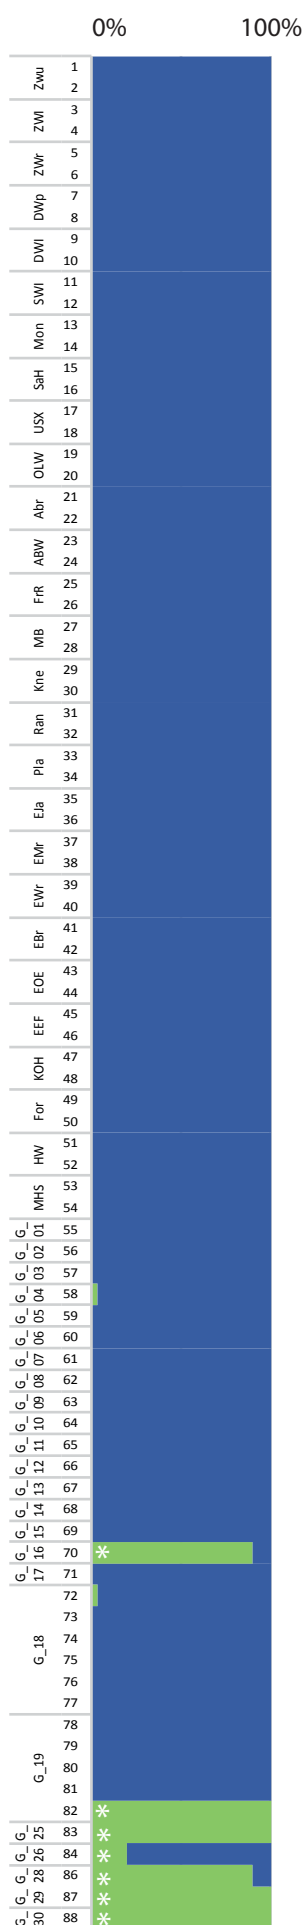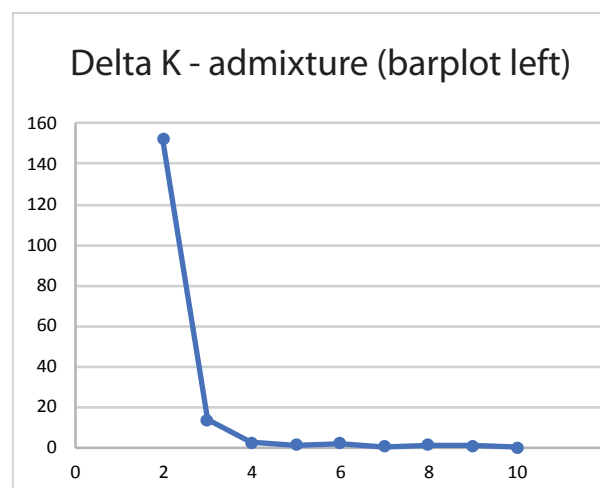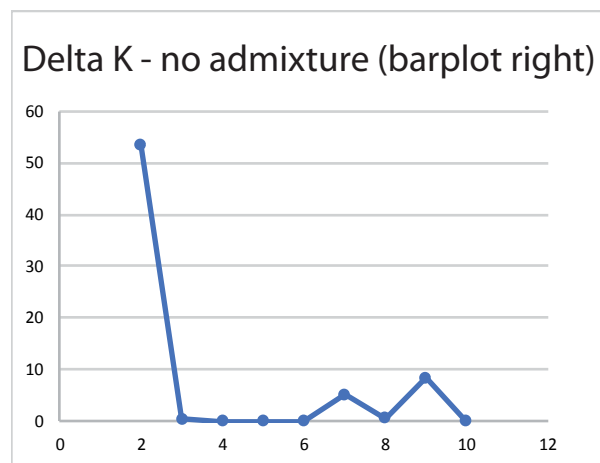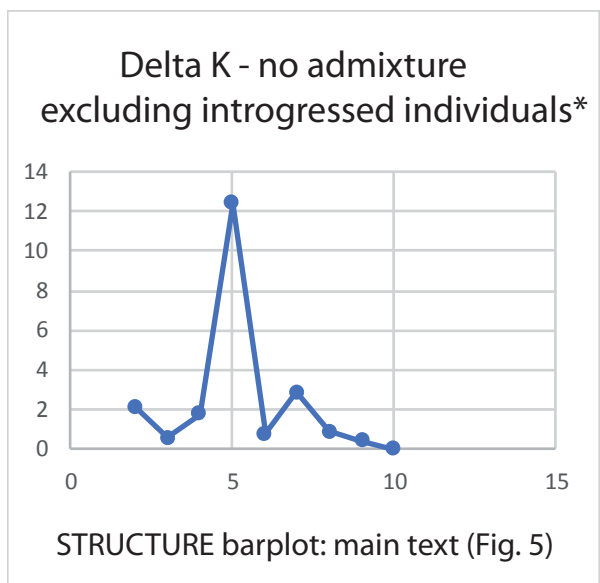

Supplement: s1 [file s1]

MrBayes  
Bayesian inferences and  
posterior probability values

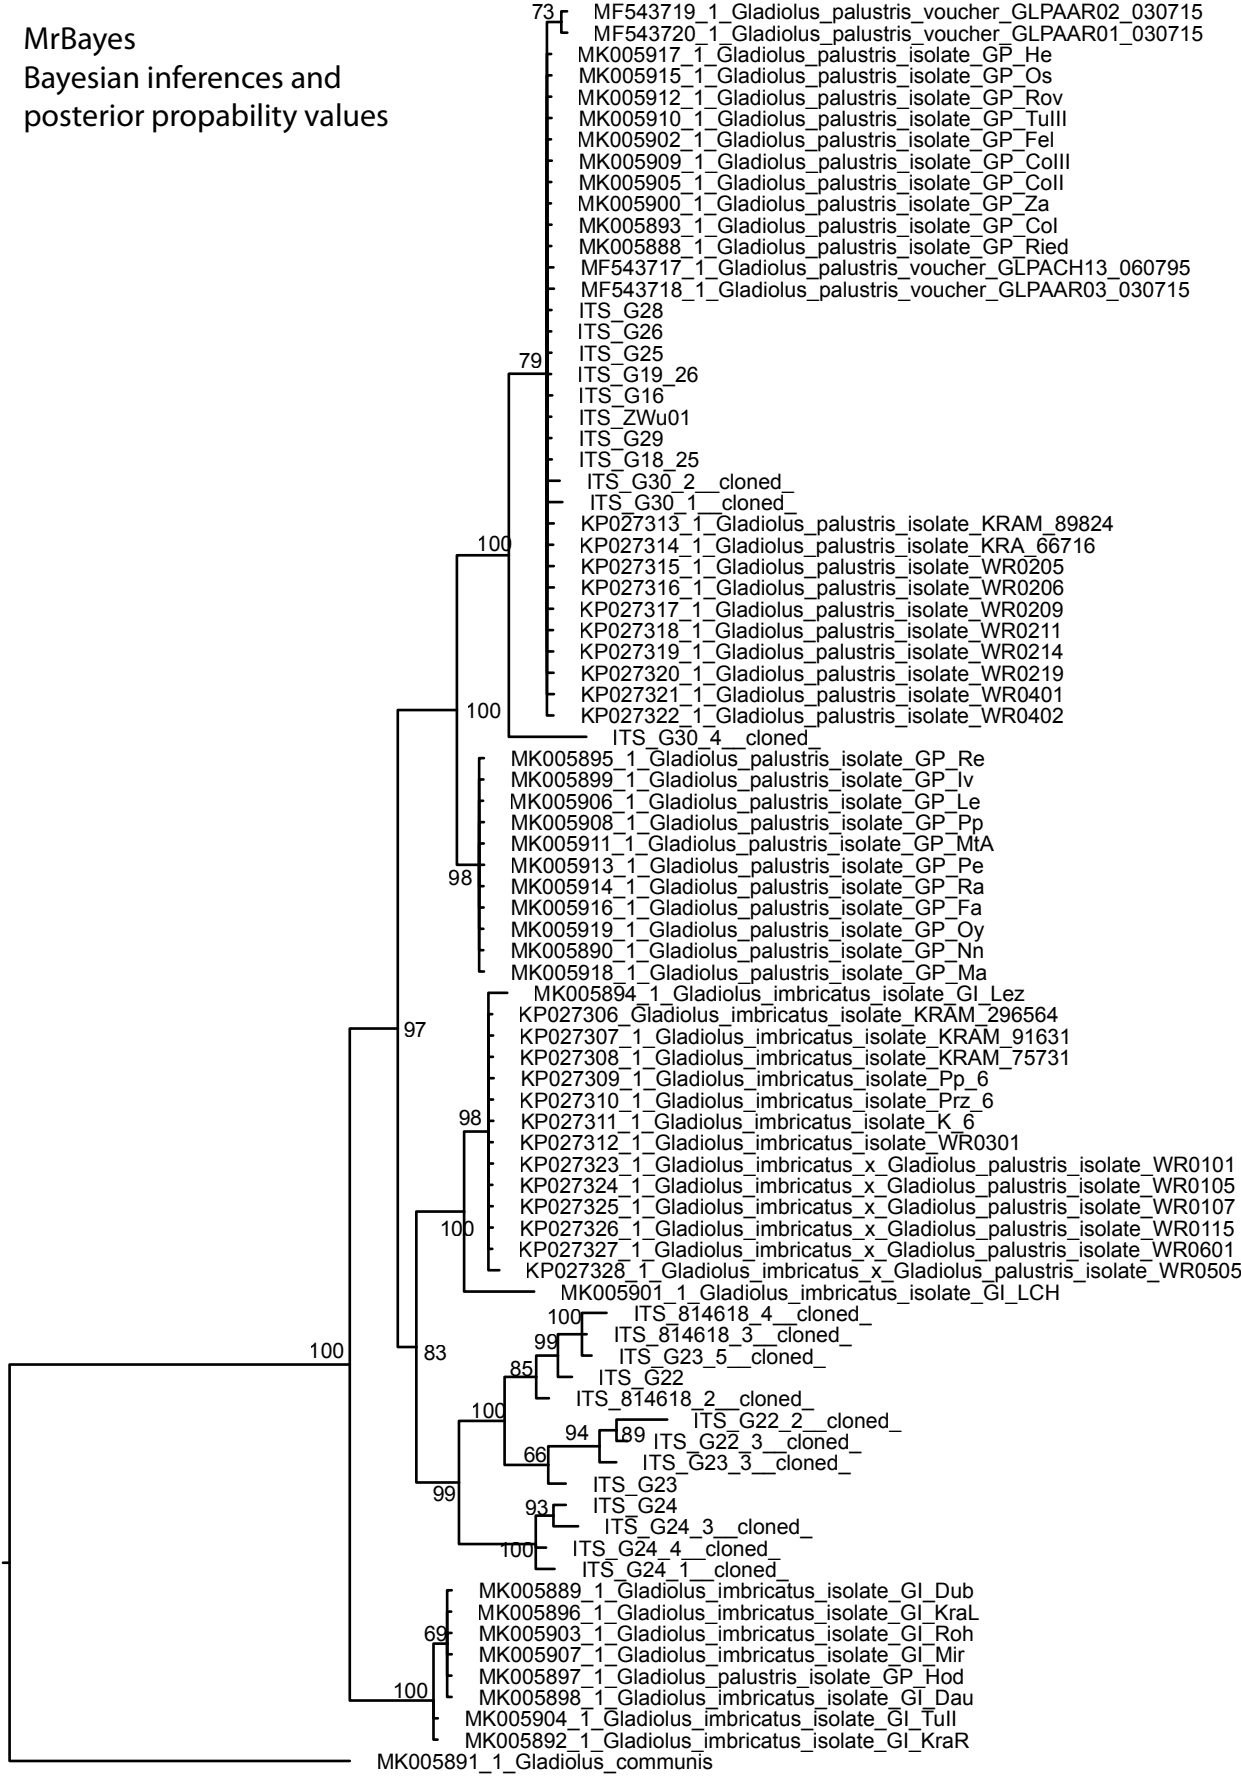

Supplement: s1 [file s1]
